# Supplementary material for: Endogenous corazonin signaling modulates the post-mating switch in behavior and physiology in females of the brown planthopper and Drosophila
Source: eLife. 2026 May 12;14:RP109297. doi: 10.7554/eLife.109297 (PMC13167112; doi:10.7554/eLife.109297)
Supplement: Figure 1—figure supplement 2—source data 1. [file elife-109297-fig1-figsupp2-data1.xlsx]

## Sheet: Sheet1
	S2				S3 A							S3 B			S4 E				S4 F
	dsgfp	dsNlCrz			4h		12h		24h			sCRZ	CRZ		WT	CrzM1	CrzM2			WT	CrzM1	CrzM2
	0.900998	0.350647			sCRZ	CRZ	sCRZ	CRZ	sCRZ	CRZ		0	0		12	13	13		days	Surviving individuals
	1.02915	0.703451			6/10	4/10	8/10	4/10	8/10	7/10		0	2		13	13	13		0	56	54	50
	1.05133	0.593358			7/10	3/10	7/10	4/10	8/10	7/8		13	0		13	13	13		2	56	54	50
	1.04225	0.513041			8/10	5/10	9/10	5/10	9/10	7/8		0	2		13	14	14		4	50	50	48
	0.849093	0.63183			7/10	4/10	8/10	5/10	9/10	9/10		0	4		13	14	14		6	44	44	42
	1.15912	0.494909										5	0		13	14	14		8	40	42	36
												0	0		13	14	14		10	38	34	32
												0	0		13	14	14		12	30	26	24
												0	0		13	14	14		14	26	20	16
												0	0		13	14	14		16	16	16	12
												0	0		13	14	14		18	4	8	0
												0	0		13	14	14		20	0	4	0
												0	12		13	14	14		22	0	0	0
												11	0		13	14	14
												0	0		13	14	14
												0	6		13	15	14
												0	0		13	15	14
												0	0		13	15	14
												0	0		13	15	15
												0	0		13	15	15
												0	0		13	15	15
												0	0		13	15	15
												0	0		13	15	15
												0	0		13	15	15
												0	5		13	15	15
												2	0		13	15	15
												0	0		15	15	15
												0	0		14	16	15
												9	0		14	16	15
												0	0		14	16	15
												0	0		14	16	16
												0	2		14	16	16
												4	0		14	16	16
												0	0		15	16	16
												0	8		14	17	16
												5	5		15	17	17
												7	7		14	17	17
												4	1		14	17	17
												0	2		14	17	17
												0	8		14	17	17
												0	0		15		17
												0	0				17
												0	0
													0
