# Supplementary material for: Endogenous corazonin signaling modulates the post-mating switch in behavior and physiology in females of the brown planthopper and Drosophila
Source: eLife. 2026 May 12;14:RP109297. doi: 10.7554/eLife.109297 (PMC13167112; doi:10.7554/eLife.109297)
Supplement: Figure 1—source data 1. [file elife-109297-fig1-data1.xlsx]

## Sheet: Sheet1
	Figure 1B										Figure 1C			Figure 1F			Figure 1K
	Receptiviy(1.5×10-3）		Receptiviy(1.5×10-4）		Receptiviy(1.5×10-5）		Receptiviy(1.5×10-6）				sCRZ	CRZ		dsgfp	dsNlCrz		WT	CrzM1	CrzM2
	sCRZ	CRZ	sCRZ	CRZ	sCRZ	CRZ	sCRZ	CRZ			3	15		71	38		74	60	63
	7/8	2/10	5/6	2/6	5/6	3/6	4/6	4/6			16	3		88	72		84	56	23
	7/9	2/9	4/5	2/6	4/5	2/5	4/5	3/5			3	18		98	71		97	42	19
	6/7	2/8	5/6	1/5	4/6	2/5	5/7	5/7			2	10		75	45		66	66	62
	6/7	3/12	4/6	1/6	3/5	2/5	4/6	5/7			9	11		95	47		91	50	11
	6/7	4/11	4/6	2/6	4/6	2/5	4/6	4/6			10	6		80	31		95	55	82
											0	3		116	76		63	40	33
											0	24		135	61		118	78	92
											4	10		141	40		82	42	49
											2	9		130	80		122	52	83
											5	30		120	61		102	45	12
											21	5		53	91		140	48	42
											7	15		106	69		120	47	56
											23	12		119	83		110	32	70
											17	18		54	72		101	58	68
	Figure 1E										5	13		122	62		82	60	72
	PMR	dsgfp	dsNlcrz(female)								12	14		128	55		56	49	57
	FM	11/15	11/15								14	18		117	58		92	42	62
		12/16	11/16								25	31		108	85		130	53	55
		9/12	9/13								1	10		66	46		136	44	63
		8/11	7/12								26	15		102	70		86	53	67
		9/14	9/14								12	38		78	50		81	55	53
		8/12	9/14								27	21		92	48		79	77	69
	Re-mating										7	15		126	106		84	45	42
		0/10	1/11								20	19		94	85		87	62	36
		0/11	1/10								15	21		90	90		97	58	34
		0/7	1/9								5	25		90	63		92	41	19
		0/8	1/7								16	13		118	70		117	17	43
		0/7	1/8								7			126	60		107	35	27
		0/7	0/7								0			99	54		116	6	48
														97	48		99	4	51
														107	46		87	15	47
	Figure 1J														67		82	23	39
	PMR（female）	WT	CrzM1	CrzM2	CrzM1/M2										83		100	18	31
	FM	11/14	9/12	8/11	8/10										48			28
		10/13	7/11	7/10	9/10										68			44
		11/13	7/10	8/10	7/10										80
		10/12	10/13	7/10	8/10
		9/10	8/12	6/10	9/10
	RM
		0/11	2/9	3/8	2/8
		0/10	1/7	2/7	2/9
		0/11	1/7	2/8	1/6
		0/10	2/10	2/7	2/8
		0/9	2/8	1/6	2/8
