# Supplementary material for: Endogenous corazonin signaling modulates the post-mating switch in behavior and physiology in females of the brown planthopper and Drosophila
Source: eLife. 2026 May 12;14:RP109297. doi: 10.7554/eLife.109297 (PMC13167112; doi:10.7554/eLife.109297)
Supplement: Figure 3—figure supplement 2—source data 1. [file elife-109297-fig3-figsupp2-data1.xlsx]

## Sheet: Sheet1
		S2 D				S2 E
		WT	CrzRM				WT	CrzRM
		13	13			days	Surviving individuals
		13	13			0	40	50
		13	13			2	40	50
		13	13			4	36	48
		13	13			6	32	43
		13	13			8	26	40
		13	13			10	26	35
		13	13			12	20	32
		13	13			14	14	31
		13	13			16	10	20
		13	13			18	4	13
		13	13			20	0	9
		13	13			23		0
		13	13
		13	13
		13	13
		13	13
		13	13
		13	13
		13	13
		13	13
		13	13
		13	13
		13	14
		13	14
		13	14
		13	14
		13	14
		13	14
		13	14
		13	14
		13	14
		13	14
		13	14
		13	14
		13	14
		14	14
		14	14
		14	14
		14	14
		14	14
		14	14
		14	14
		14	15
		14	15
		14	15
		14	15
		14	15
		15	15
		15	15
		15	16
		15	16
		15	16
			16
			16
			16
			16
			17
			17
			17
			17
			17
