# Supplementary material for: Endogenous corazonin signaling modulates the post-mating switch in behavior and physiology in females of the brown planthopper and Drosophila
Source: eLife. 2026 May 12;14:RP109297. doi: 10.7554/eLife.109297 (PMC13167112; doi:10.7554/eLife.109297)
Supplement: Figure 3—source data 1. [file elife-109297-fig3-data1.xlsx]

## Sheet: Sheet1
	Figure 3B						Figure 3C			Figure 3E			Figure 3F
	PMR	dsgfp	dsNlcrzR(female)				dsgfp	dsNlCrzR		Receptivity(dscrzR+CRZ)			Receptivity(dscrzR+SFP)
	FM	15/23	20/30				92	88		dsgfp+CRZ	dsCrzR+CRZ		dsgfp+SFP	dsCrzR+SFP
		14/22	21/30				65	70		2/7	8/10		3/8	5/8
		14/19	13/23				92	47		3/8	7/8		3/8	6/9
		11/18	15/26				68	74		4/9	7/9		3/9	6/9
		13/19	16/26				72	37		3/7	8/10		2/7	6/8
	Re-mating						93	42		2/7	9/12		3/8	5/8
		0/12	2/16				71	50
		1/10	1/16				112	35
		1/10	1/10				111	27
		0/9	1/9				86	42
		0/13	2/9				125	45
							114	39
							82	32
							61	40
							45	25
							63	22
							112	10
							76	45
							69	30
							110	65
							99	28
							95	35
							103	44
							117	17
							82	35
							102	25
							118	29
							44	63
							67	53
							48	28
							39	33
							85
							76
	Figure 3I						Figure 3J			Figure 3K			Figure 3L			Figure 3M
	PMR（female）	WT	CrzRM				WT	CrzRM		Receptivity(crzR mutant+CRZ)			Receptivity(crzR muyant+SFP)			Receptivity(crzR mutant+macc)
	FM	9/12	18/21				52	65		WT+CRZ	mutant+CRZ		WT+SFP	mutant+SFP		WT+macc	mutant+macc
		12/16	15/19				66	91		1/5	5/6		1/7	5/8		11/19	13/21
		7/10	13/16				45	75		2/6	4/6		2/7	6/8		7/16	9/14
		12/15	11/13				37	53		2/6	3/6		1/7	5/8		3/10	8/10
		9/13	11/13				86	60		2/6	4/6		2/7	6/8		5/10	6/10
	RM						70	56		1/5	4/6		1/7	6/8		4/10	10/14
		0/9	6/17				45	40
		0/12	4/15				116	39
		0/7	4/13				100	57
		0/12	4/11				115	42
		0/9	3/10				106	30
							83	54
							96	60
							98	32
							117	65
							68	40
							62	45
							73	47
							60	24
							80	45
							109	34
							140	51
							95	55
							89	46
							81	62
							83	56
							121	41
							59	37
							76	26
							82	49
							53	52
							77
