# Supplementary material for: Endogenous corazonin signaling modulates the post-mating switch in behavior and physiology in females of the brown planthopper and Drosophila
Source: eLife. 2026 May 12;14:RP109297. doi: 10.7554/eLife.109297 (PMC13167112; doi:10.7554/eLife.109297)
Supplement: Figure 4—figure supplement 1—source data 1. [file elife-109297-fig4-figsupp1-data1.xlsx]

## Sheet: Sheet1
	S1 A						S1 B
	4L	5L	Female	Male			Female head	Female thorax	Female abdomen	male head	male thorax	male abdomen
	0.203961	0.227388	0.792884	0.213647			0.18646	0.424779	1	0.306118	0.0282404	0.0286696
	0.324437	0.21546	1.08369	0.180439			0.226592	0.5023	0.879761	0.297911	0.0293261	0.0291875
	0.227968	0.232432	1.12342	0.181137			0.206526	0.46354	0.939881	0.302015	0.0287833	0.0289286
