# Supplementary material for: Endogenous corazonin signaling modulates the post-mating switch in behavior and physiology in females of the brown planthopper and Drosophila
Source: eLife. 2026 May 12;14:RP109297. doi: 10.7554/eLife.109297 (PMC13167112; doi:10.7554/eLife.109297)
Supplement: Figure 4—source data 3. [file elife-109297-fig4-data3.xlsx]

## Sheet: Sheet1
	Figure 4C
	NS	FB	EP	DS	FRO	MRO
	0.036	0.055	0.006	0.012	0.872	0.006
	0.034	0.038	0.006	0.011	1	0.006
	0.031	0.049	0.007	0.013	0.829	0.005
	0.035	0.053	0.006	0.012	0.818	0.004
