# Supplementary material for: Endogenous corazonin signaling modulates the post-mating switch in behavior and physiology in females of the brown planthopper and Drosophila
Source: eLife. 2026 May 12;14:RP109297. doi: 10.7554/eLife.109297 (PMC13167112; doi:10.7554/eLife.109297)
Supplement: Figure 5—source data 3. [file elife-109297-fig5-data3.xlsx]

## Sheet: Sheet1
	Figure 7B				Figure 7C				Figure 7E				Figure 7F				Figure 7G
		CS	Crzattp		CS	Crzattp			CS	Crz-Gal4>Crz-RNAi			CS	Crz-Gal4>Crz-RNAi			sCRZ	CRZ
	FM	7/8	10/12		44	43		FM	10/10	11/12			Crz-Gal4/+	Crz-Gal4>crz-RNAi			7/11	6/14
		7/8	11/13		52	26			10/11	10/11			23	24			6/9	7/15
		7/8	8/11		57	32			11/12	11/13			43	26			10/16	4/11
		7/8	14/16		46	31			9/10	9/10			49	36			6/11	7/16
		8/8	12/14		74	32			11/12	11/12			42	0
					24	10							0	24
	RM	0/6	4/10		55	15		RM	0/9	2/10			34	28
		0/6	4/11		53	26			0/9	2/8			0	0
		0/6	3/8		51	38			0/10	2/9			48	0
		0/6	5/12		31	28			0/9	2/8			29	7
		0/7	4/11		73	27			1/11	2/10			49	17
					46	32							26	30
					46	16							72	27
					48	26							45	14
					55	38							36	28
					46	35							19	13
					62	28							18	15
					51	36							32	32
					48	31							43	0
					56	39							46	9
					52	19							47	0
					56	37							38	29
					89	39							41	21
					61	26							52	22
					47	36							37	13
					85	25							46	15
					53	40							41	29
					54	12							39	27
					58	40							29	49
					72	27							41	31
					65	40							54	33
					44	39							28	28
					69	21							26	26
						34							21	23
													33	38
														41
